# Supplementary material for: 6α-hydroxylated bile acids mediate TGR5 signalling to improve glucose metabolism upon dietary fiber supplementation in mice
Source: HighWire-hosted journal article supplement (doi:10.1136/gutjnl-2021-326541), 2022-06-13
Supplement: gutjnl-2021-326541supp002_data_supplement.pdf [file gutjnl-2021-326541supp002_data_supplement.pdf]

Supplementary table 1: Western-style diet composition (ENVIGO)

|                                                | Western Diet No<br>Cellulose –<br>(TD.170882) | Western Diet 10%<br>Cellulose – (TD.170883) | Western Diet 10%<br>Oligo Inulin –<br>(TD.170885) |
|------------------------------------------------|-----------------------------------------------|---------------------------------------------|---------------------------------------------------|
| <b>Formula</b>                                 |                                               | <b>g/Kg</b>                                 |                                                   |
| Casein                                         | 236                                           | 236                                         | 236                                               |
| DL-Methionine                                  | 3.54                                          | 3.54                                        | 3.54                                              |
| Sucrose                                        | 222.62                                        | 182.52                                      | 182.52                                            |
| Corn Starch                                    | 160                                           | 100                                         | 100                                               |
| Maltodextrin                                   | 120                                           | 120                                         | 120                                               |
| Cellulose                                      | 0                                             | 100                                         | 0                                                 |
| Oligofructose (Orafti®P95)                     | 0                                             | 0                                           | 100                                               |
| Vegetable Shortening, hydrogenated<br>(Primex) | 100                                           | 100                                         | 100                                               |
| Beef Tallow                                    | 100                                           | 100                                         | 100                                               |
| Mineral Mix, AIN-93G-MX (94046)                | 41.3                                          | 41.3                                        | 41.3                                              |
| Calcium Phosphate, dibasic                     | 4.72                                          | 4.72                                        | 4.72                                              |
| Vitamin Mix, Teklad (40060)                    | 11.8                                          | 11.8                                        | 11.8                                              |
| Ethoxyquin, antioxidant                        | 0.02                                          | 0.02                                        | 0.02                                              |
| <b>Selected Nutrient Information</b>           |                                               | <b>% kCal</b>                               |                                                   |
| Protein                                        | 18                                            | 19.6                                        | 19.6                                              |
| Carbohydrate                                   | 42.7                                          | 37.6                                        | 37.6                                              |
| Fat                                            | 39.3                                          | 42.8                                        | 42.8                                              |
| <b>Kcal/g</b>                                  | <b>4.6</b>                                    | <b>4.3</b>                                  | <b>4.3</b>                                        |

**Supplementary table 2: Primers used for gene expression analysis**

|                          |                            |
|--------------------------|----------------------------|
| Cyp2c70-F                | AGGCTTAGGCATCGTCTTCA       |
| Cyp2c70-R                | ATCACATTGCAGGGAACACA       |
| Cyp7a1-F                 | AGCAACTAAACAACCTGCCAGTACTA |
| Cyp7a1-R                 | GTCCGGATATTCAAGGATGCG      |
| Cyp7b1-F                 | TAGCCCTCTTCTCCACTCATA      |
| Cyp7b1-R                 | GAACCGATCGAACCTAAATTCCT    |
| Cyp8b1-F                 | GGCTGGCTTCTGAGCTTATT       |
| Cyp8b1-R                 | ACTTCCTGAACAGCTCATCGG      |
| Cyp27a1-F                | GCCTCACCTATGGGATCTTCA      |
| Cyp27a1-R                | TCAAAGCCTGACGCAGATG        |
| Fgf15-F                  | GAGGACCAAAAACGAACGAAATT    |
| Fgf15-R                  | ACGTCCTTGATGGCAATCG        |
| Fxr-F                    | TCCAGGGTTTCAGACACT         |
| Fxr-R                    | GCCGAACGAAGAAACATGG        |
| Gcg-F                    | GCGAGGGACCTGCCTATGCAAC     |
| Gcg-R                    | AATGGCGACTTCTTCTGGGAA      |
| Ibat-F                   | ACCACTTGCTCCACTGCTT        |
| Ibat-R                   | CGTTCCTGAGTCAACCCACAT      |
| NeuroD1-F                | CCAGGGTTATGAGATCGTC        |
| NeuroD1-R                | CGCTCTCGCTGTATGATTT        |
| Ngn3-F                   | GCATGCACAACCTCAACTC        |
| Ngn3-R                   | TTTGTAAGTTTGGCGTCATC       |
| Pax6-F                   | AACAACCTGCCTATGCAAC        |
| Pax6-R                   | ACTTGGACGGGAACCTGACA       |
| Pcsk1-F                  | CTTTGCTCTGGCCTTGGA         |
| Pcsk1-R                  | AATCGGCTGTTACCATCAA        |
| Slc51a (Ost $\alpha$ )-F | TGTTCCAGGTGCTTGTATCC       |
| Slc51a (Ost $\alpha$ )-R | CCACTGTTAGCCAAGATGGAGAA    |
